# Supplementary material for: Beneficial Phytochemicals with Anti-Tumor Potential Revealed through Metabolic Profiling of New Red Pigmented Lettuces (Lactuca sativa L.)
Source: PubMed Central journal article supplement (PMC5979491; doi:10.3390/ijms19041165), 2018-04-11
Supplement: ijms-19-01165-s001.pdf [file ijms-19-01165-s001.pdf]

Table S1. Significant difference metabolites content in six red pigmented lettuces cultivars. Values (mean  $\pm$  SD, n=3) of the same compound followed by different lowercase letters indicate significant difference ( $p < 0.01$ ).

| Compounds                                     | Area $\times 10^5$  |                    |                     |                     |                     |                     |
|-----------------------------------------------|---------------------|--------------------|---------------------|---------------------|---------------------|---------------------|
|                                               | S-1                 | S-2                | S-3                 | B-1                 | B-2                 | B-3                 |
| Malvidin 3-O-glucoside (Oenin)                | 1.41 $\pm$ 0.04b    | 1.22 $\pm$ 0.06b   | 0.92 $\pm$ 0.04c    | 1.04 $\pm$ 0.04c    | 2.59 $\pm$ 0.13a    | 2.15 $\pm$ 0.09a    |
| Cyanidin 3-O-glucosyl-malonylglucoside        | 16.89 $\pm$ 0.51b   | 4.56 $\pm$ 0.23c   | 15.85 $\pm$ 0.63b   | 4.35 $\pm$ 0.17c    | 26.40 $\pm$ 1.32a   | 18.70 $\pm$ 0.75b   |
| Cyanidin-3,5-O-diglucoside (Cyanin)           | 1.46 $\pm$ 0.04b    | 0.93 $\pm$ 0.04c   | 1.36 $\pm$ 0.05b    | 0.41 $\pm$ 0.02d    | 3.14 $\pm$ 0.16a    | 1.52 $\pm$ 0.06b    |
| Apigenin -glucuronide                         | 4.12 $\pm$ 0.1b     | 2.55 $\pm$ 0.13c   | 1.68 $\pm$ 0.07d    | 3.25 $\pm$ 0.13b    | 7.21 $\pm$ 0.36a    | 5.03 $\pm$ 0.20b    |
| Luteolin 7-O-glucoside (Cynaroside)           | 1.12 $\pm$ 0.06d    | 1.55 $\pm$ 0.12d   | 0.68 $\pm$ 0.002e   | 2.23 $\pm$ 0.20c    | 6.25 $\pm$ 0.41a    | 4.61 $\pm$ 0.29b    |
| Luteolin O-hexosyl-O-gluconic acid            | 0.06 $\pm$ 0.001b   | 0.05 $\pm$ 0.001b  | 0.08 $\pm$ 0.001b   | 0.04 $\pm$ 0.001b   | 0.15 $\pm$ 0.002a   | 0.03 $\pm$ 0.001b   |
| Quinic acid                                   | 49.55 $\pm$ 2.4b    | 32.00 $\pm$ 1.62c  | 25.05 $\pm$ 1.98c   | 26.10 $\pm$ 1.01c   | 75.20 $\pm$ 3.71a   | 53.40 $\pm$ 2.46b   |
| Gallic acid                                   | 121.50 $\pm$ 3.64b  | 87.25 $\pm$ 4.36c  | 87.60 $\pm$ 3.50c   | 86.15 $\pm$ 3.45c   | 158.80 $\pm$ 7.91a  | 132.50 $\pm$ 5.37b  |
| Neochlorogenic acid (5-O-Caffeoylquinic acid) | 49.55 $\pm$ 1.47b   | 32.00 $\pm$ 1.60c  | 25.05 $\pm$ 1.00c   | 26.10 $\pm$ 1.04c   | 75.20 $\pm$ 3.76a   | 53.40 $\pm$ 2.14b   |
| Chlorogenic acid (3-O-Caffeoylquinic acid)    | 577.50 $\pm$ 17.23b | 607.5 $\pm$ 30.36a | 549.50 $\pm$ 21.98c | 565.00 $\pm$ 22.45b | 620.00 $\pm$ 31.00a | 543.00 $\pm$ 21.71c |
| Caffeic acid O-glucoside                      | 29.65 $\pm$ 0.89b   | 19.60 $\pm$ 0.98c  | 19.30 $\pm$ 0.77c   | 20.80 $\pm$ 0.83c   | 44.35 $\pm$ 2.22a   | 43.55 $\pm$ 1.74a   |
| Caffeic acid                                  | 181.00 $\pm$ 5.43b  | 185.5 $\pm$ 9.38b  | 150.15 $\pm$ 6.01d  | 141.45 $\pm$ 5.65e  | 248.50 $\pm$ 12.43a | 160.25 $\pm$ 6.41c  |
| Coumaroylquinic acid                          | 0.65 $\pm$ 0.02b    | 0.57 $\pm$ 0.03c   | 0.52 $\pm$ 0.02c    | 0.63 $\pm$ 0.03b    | 0.72 $\pm$ 0.04a    | 0.61 $\pm$ 0.02b    |
| p-Coumaric acid                               | 3.88 $\pm$ 0.12b    | 4.03 $\pm$ 0.20b   | 3.64 $\pm$ 0.15c    | 2.91 $\pm$ 0.12d    | 5.17 $\pm$ 0.26a    | 3.62 $\pm$ 0.14c    |
| Ferulic acid                                  | 0.88 $\pm$ 0.026b   | 0.62 $\pm$ 0.03c   | 1.08 $\pm$ 0.04a    | 0.66 $\pm$ 0.03c    | 1.31 $\pm$ 0.07a    | 0.75 $\pm$ 0.03b    |

Peak Area (Area) represents the relative content of the metabolites.
